# Supplementary material
Source: publisher site journal article supplement (https://www.dovepress.com/article/536096)
Supplement: Supplementary file 1 [file Supplemental%20material_1.docx]

**1. Calculation of Low Back Pain Disease Burden Attributable to Occupational Ergonomic Factors**

**1.1 Indicator Selection**

(1) YLDs (Years Lived with Disability): YLD is a key indicator for measuring the overall burden of disease. It includes the years of healthy life lost due to premature death (compared to the standard life expectancy) and the years of healthy life lost due to disability (calculated by weighting the severity of disability).

(2) YLD Rate: The YLD rate refers to the number of YLDs lost per unit of population due to occupational ergonomics-related low back pain. It is typically expressed as the number of YLDs per 100,000 person-years and can be calculated using the following formula:

YLD Rate = (YLDs / Average population) × Base factor.

**1.2 Age Standardization**

Age is a risk factor for many diseases (such as cancer and cardiovascular diseases). Differences in the age distribution across populations may lead to biases in crude rates (such as crude YLD rate). To eliminate the effect of age distribution and make comparisons across different populations or time periods more accurate and scientific, this study applies age-standardization to the indicators. The age-standardized rate adjusts for age structure differences using statistical methods, ensuring that the target population has the same age structure (usually using a “standard population”). The calculation formula is:

Summation [(YLDs in each age group / population in the same age group) × the weight of the same age group in the world standard population table (GBD population standard)].

**1.3 Estimated Annual Percentage Change**

Estimated Annual Percentage Change (EAPC) is used to measure the average annual relative change in a given indicator (such as age-standardized incidence rate, YLD rate, etc.) over time, expressed as a percentage. The core idea is to fit the time trend using statistical models (such as logarithmic linear regression) and convert the regression coefficient into a percentage change, reflecting the rate of increase or decrease of the indicator over time [43]. If EAPC > 0, it indicates an average annual increase in the indicator; if EAPC < 0, it indicates an average annual decrease. Additionally, if the 95% confidence interval of EAPC includes 0, it suggests that the change trend is not statistically significant.

**1.4 Population Analysis**

This study analyzes the distribution of the burden of low back pain caused by occupational ergonomics across different populations, including by age and gender. The population is divided into fourteen age groups (15-19, 20-24, 25-29, 30-34, 35-39, 40-44, 45-49, 50-54, 55-59, 60-64, 65-69, 70-74, 75-79, 80+), with separate classifications for males and females. Statistical analysis is performed using R, and data visualization is carried out with the ggplot2 package.

**1.5 Time Trend Analysis**

This study uses Joinpoint regression analysis to examine the time trends of YLDs, YLD rates, and age-standardized YLD rates for low back pain caused by occupational ergonomics from 1990 to 2021. The Segment and broom R packages are used to detect significant trend changes, calculate Annual Percent Change (APC) and Average Annual Percent Change (AAPC), and evaluate the statistical significance of trends using 95% confidence intervals (CIs).

The Joinpoint regression model, also known as broken-line regression, is used in epidemiological studies of diseases. The study period is set as the independent variable for the regression, and segmented regression is used to model the disease's time characteristics. Trend fitting is performed within each segment to assess the disease's trend over specific periods. This section fits the natural logarithm of the burden of low back pain caused by occupational ergonomics for specific periods, calculates the APC value and its confidence interval for each segment, compares the results with the null hypothesis of no change (0%), and ultimately uses the AAPC to describe the overall trend of the rates.

(1) Model Principle

The Joinpoint regression model mainly consists of linear and log-linear models, differing due to the type of dependent variable. In medical research, dependent variables are often exponentially distributed or follow a Poisson distribution, so the log-linear model is more commonly used.

The model fits the data by minimizing the sum of squared residuals and uses optimization algorithms to determine the best location for Joinpoints and the slope for each trend segment. To determine the number and position of Joinpoints in the model, the Joinpoint regression analysis conducts multiple comparisons and statistical tests. This includes comparing the goodness-of-fit for different models (with different numbers of Joinpoints) and testing the significance of the Joinpoint positions. The results of the model include the slope for each trend segment (i.e., AAPC or APC), the location of Joinpoints, and their confidence intervals. These results help researchers understand the trends of data over time and predict future changes.

(2) Statistical Metrics

① Joinpoint Position

The model identifies the trend change points in the data, which are the Joinpoints. These points represent significant changes in the trend (e.g., incidence or YLD rate) in specific years.

② Annual Percent Change (APC)

APC represents the average annual percentage change in each trend segment. It is calculated by determining the percentage change in the slope within the segment. APC can be positive (indicating an increasing trend) or negative (indicating a decreasing trend).

③ Average Annual Percent Change (AAPC)

AAPC is the average percentage change over the entire study period, taking into account the change rates for all trend segments. It provides an overall description of the trend changes over the entire study period, especially when trends differ across periods.

④ Goodness-of-Fit of the Model

The goodness-of-fit of the model can be assessed using statistical measures such as R-squared, which reflects how well the model fits the data. A higher R-squared indicates a better fit, meaning the model explains the data more effectively.

**1.6 Age-Period-Cohort Model**

The Age-Period-Cohort (APC) model is a commonly used method in epidemiological research. This model applies a log-linear approach to decompose the independent effects of age, period, and birth cohort on disease risk, and explains how these factors jointly influence various aspects of a population, such as behavior, health, and economic status.

(1) Data Decomposition:

① Age Effect: Individuals are influenced by physiological, psychological, and social environmental factors at different stages of their life cycle. For example, as individuals age, their physiological functions gradually change, which affects the incidence of diseases, YLD rates, behavioral patterns, and so on.

② Period Effect: External environmental changes, such as social, political, economic, and cultural factors, affect all populations at a specific time point. The period effect influences people of different ages and is typically global. For instance, an economic crisis during a specific period may have a similar impact on all age groups.

③ Cohort Effect: Specific birth cohorts (or groups) are uniquely influenced by factors such as their environment during growth, historical period, and cultural background. Each cohort experiences specific socio-economic and historical events during a given period, which may result in differing behavioral patterns and health status compared to other cohorts. For example, people born in the 1950s may have different smoking habits than those born in the 1970s.

(2) Interactions:

These three effects—age, period, and cohort—are intertwined, and many social phenomena cannot be attributed to a single factor. For example, in disease studies, the age effect may influence a population's health status, the period effect may be due to the outbreak of a specific epidemic, and the cohort effect may reflect the varying levels of acceptance of certain health behaviors across different generations.

**1.7 Decomposition Analysis**

Decomposition analysis is a statistical method that breaks down a complex total change into the contributions of different factors. In disease burden analysis, it is commonly used to decompose the change in disease burden and attribute the difference in YLDs between two time points to the changes in three independent factors:

(1) Aging: The change in population age structure, i.e., the shift towards an older population, commonly referred to as population aging.

(2) Population: The change in population size.

(3) Epidemiological Change: The change in age-specific rates, reflecting the combined effect of all factors other than age structure and population size.

The basic formula for decomposition is as follows:

A = Ma + Iam + Ipa + Ipam, where A represents the primary effect of population aging, Ma is the effect of age-specific YLD rates, Iam is the interaction effect of aging and age-specific rates, Ipa is the interaction effect of aging and population growth, and Ipam is the joint interaction effect of all three factors.

P = Mp + Ipm + Ipa + Ipam, where P represents the primary effect of population growth, Mp is the effect of population growth, Ipm is the interaction effect of population and age-specific rates, Ipa is the interaction effect of population and aging, and Ipam is the joint interaction effect of all three factors.

M = Mm + Ipm + Iam + Ipam, where M represents the primary effect of changes in age-specific rates, Mm is the effect of age-specific rates, Ipm is the interaction effect of age-specific rates and population, Iam is the interaction effect of age-specific rates and aging, and Ipam is the joint interaction effect of all three factors.

This method decomposes the changes in disease-related burden into the factors caused by population aging (A), population growth (P), and changes in age-specific rates (M). The decomposition results include both the absolute and relative contributions of each factor to the change in disease-related burden. The absolute contribution represents the amount of burden attributed to the disease, while the relative contribution (i.e., "attributable proportion") is calculated by dividing the attributable burden by the total burden in 1990 and multiplying by 100%. If the attributable YLDs exceed the total YLDs in 1990, the proportion may exceed 100%.

**1.8 BAPC Projection Analysis**

We used the Bayesian age-period-cohort (BAPC) model to project the future burden of low back pain due to occupational ergonomic factors. The model, implemented with the INLA and BAPC R packages, incorporates age, period, and cohort effects to predict disease trends from 2022 to 2040.
